# Supplementary material for: Single-Molecule Real-Time Sequencing of Full-Length Transcriptome and Identification of Genes Related to Male Development in Cannabis sativa
Source: MDPI journal article supplement (doi:10.3390/plants11243559), 2022-12-16
Supplement: s1 [file s1]

**Table S1.** The primers sequence used for alternative splicing validation and qRT-PCR analysis.

| Name          | Primer               | Primer sequence (5'-3') | Application                           |
|---------------|----------------------|-------------------------|---------------------------------------|
| PB.870        | PB.870-1F (forward)  | ATGGATCCTTACAAGTATCGA   | Alternative<br>splicing<br>validation |
|               | PB.870-2F (forward)  | CAGGTAACCTTTGTCAAGTTC   |                                       |
|               | PB.870-R (reverse)   | AATGTTAGGCCTAACATTGA    |                                       |
| PB.4392       | PB.4392-1F (forward) | ATGGCGATTGTACCTTCT      | Alternative<br>splicing<br>validation |
|               | PB.4392-2F (forward) | TCAGCTTATAGGAACTTGC     |                                       |
|               | PB.4392-R (reverse)  | TCTTCTACTTGCAGCCTTAC    |                                       |
| <i>PLD1_2</i> | PB.68.1-F            | GCAAACCTCACCGGAGAATC    | Quantitative<br>Real-time PCR         |
|               | PB.68.1-R            | CATTGCGGTTCTCGAGCGTT    |                                       |
| <i>CER1</i>   | PB.837.1-F           | ATATGACCACACCCGAGTCC    |                                       |
|               | PB.837.1-R           | GAGGCCACATCAACCAAAGG    |                                       |
| <i>KAR</i>    | PB.4165.2-F          | TGCAGGTTCCATTGTATGTGG   |                                       |
|               | PB.4165.2-R          | GCAGTGAGGTTTGTAACCTATCC |                                       |
| <i>eIF4a</i>  | eIF4a-F              | CAATCCCTGCGTCCTGATAAC   | Reference gene                        |
|               | eIF4a-R              | GACCTGAATCTTTGGCGGTAG   |                                       |

**Table S2.** Statistics of subreads results

| <b>Sample</b> | <b>Total reads</b> | <b>Total base (bp)</b> | <b>Min length</b> | <b>Max length</b> | <b>Mean length</b> |
|---------------|--------------------|------------------------|-------------------|-------------------|--------------------|
| GYDM          | 10323271           | 17342613557            | 50                | 111824            | 1679.95            |

**Table S3.** Summary of high-quality isoforms results

| <b>Sample</b> | <b>Total number</b> | <b>Total base (bp)</b> | <b>Min length</b> | <b>Max length</b> | <b>Mean length</b> |
|---------------|---------------------|------------------------|-------------------|-------------------|--------------------|
| GYDM          | 32635               | 63366650               | 137               | 7149              | 1941.68            |

**Table S4.** BUSCO assessment results

| <b>Class</b>                        | <b>Number</b> | <b>Percentage (%)</b> |
|-------------------------------------|---------------|-----------------------|
| Complete BUSCOs (C)                 | 735           | 51.1%                 |
| Complete and single-copy BUSCOs (S) | 548           | 38.1%                 |
| Complete and duplicated BUSCOs (D)  | 187           | 13.0%                 |
| Fragmented BUSCOs (F)               | 42            | 2.9%                  |
| Missing BUSCOs (M)                  | 663           | 46.0%                 |
| Total BUSCO groups searched         | 1440          | 100%                  |

**Table S5.** KEGG database function annotation statistics

| Classification level1          | Classification level2                       | Gene number | Percentage |
|--------------------------------|---------------------------------------------|-------------|------------|
| Cellular Processes             | Cell growth and death                       | 203         | 5.18       |
|                                | Cell motility                               | 40          | 1.02       |
|                                | Cellular community - eukaryotes             | 74          | 1.89       |
|                                | Cellular community - prokaryotes            | 52          | 1.33       |
|                                | Transport and catabolism                    | 361         | 9.21       |
| Environmental                  | Membrane transport                          | 27          | 0.69       |
| Information Processing         | Signal transduction                         | 632         | 16.12      |
| Genetic Information Processing | Folding, sorting and degradation            | 462         | 11.79      |
|                                | Replication and repair                      | 71          | 1.81       |
|                                | Transcription                               | 254         | 6.48       |
|                                | Translation                                 | 622         | 15.87      |
| Metabolism                     | Amino acid metabolism                       | 441         | 11.25      |
|                                | Biosynthesis of other secondary metabolites | 193         | 4.92       |
|                                | Carbohydrate metabolism                     | 715         | 18.24      |
|                                | Energy metabolism                           | 420         | 10.71      |
|                                | Global and overview maps                    | 517         | 13.19      |
|                                | Glycan biosynthesis and metabolism          | 74          | 1.89       |
|                                | Lipid metabolism                            | 316         | 8.06       |
|                                | Metabolism of cofactors and vitamins        | 224         | 5.71       |
|                                | Metabolism of other amino acids             | 181         | 4.62       |
|                                | Metabolism of terpenoids and polyketides    | 133         | 3.39       |
|                                | Nucleotide metabolism                       | 150         | 3.83       |
|                                | Xenobiotics biodegradation and metabolism   | 65          | 1.66       |

**Table S6.** Statistics of genes involved in starch and sucrose metabolic pathway

| gene_id      | description                                                                    | length | Female   | Leaf     | Male     | Root     | Stem     | KO_name          |
|--------------|--------------------------------------------------------------------------------|--------|----------|----------|----------|----------|----------|------------------|
| LOC115699096 | probable galacturonosyltransferase 14, transcript variant X1                   | 2904   | 24.7567  | 10.8767  | 136.01   | 37.0633  | 37.6967  | GAUT12S          |
| LOC115699566 | glucose-1-phosphate adenylyltransferase small subunit 2, chloroplastic         | 1928   | 109.7433 | 109.0233 | 210.52   | 42.2467  | 66.8067  | glgC             |
| LOC115700349 | pectinesterase-like                                                            | 1557   | 0.17     | 0        | 10.5067  | 0        | 0.0433   | E3.1.1.11        |
| LOC115700520 | beta-glucosidase 40                                                            | 2016   | 3.27     | 2.7567   | 96.8233  | 26.4467  | 26.92    | E3.2.1.21        |
| LOC115701044 | glucose-1-phosphate adenylyltransferase large subunit 1, transcript variant X1 | 2148   | 23.0133  | 6.7733   | 126.2233 | 19.16    | 22.49    | glgC             |
| LOC115702125 | pectinesterase/pectinesterase inhibitor PPE8B                                  | 1803   | 63.37    | 49.21    | 114.7533 | 41.48    | 25.1333  | E3.1.1.11        |
| LOC115702270 | 1,4-alpha-glucan-branching enzyme 2-2, chloroplastic/amyloplastic              | 3231   | 12.5933  | 14.9     | 34.99    | 14.1733  | 23.72    | GBE1, glgB       |
| LOC115702875 | probable galacturonosyltransferase 3, transcript variant X1                    | 2301   | 14.17    | 3.0967   | 25.4833  | 14.4633  | 14.7433  | GAUT             |
| LOC115707547 | hexokinase-1, transcript variant X2                                            | 1823   | 57.3567  | 11.92    | 199.4633 | 58.6167  | 66.05    | HK               |
| LOC115712769 | phosphoglucomutase, cytoplasmic                                                | 2123   | 117.8633 | 63.2467  | 444.4833 | 156.5733 | 294.64   | pgm              |
| LOC115712818 | glucose-1-phosphate adenylyltransferase large subunit 1                        | 2592   | 41.8267  | 14.6667  | 75.4067  | 27.46    | 46.54    | glgC             |
| LOC115716397 | starch synthase 1, chloroplastic/amyloplastic                                  | 2431   | 25.5933  | 20.0367  | 148.82   | 8.13     | 29.3067  | glgA             |
| LOC115716555 | glucose-6-phosphate isomerase, cytosolic                                       | 2134   | 45.4833  | 27.2433  | 96.87    | 57.5267  | 65.48    | GPI, pgi         |
| LOC115716775 | probable fructokinase-7                                                        | 1572   | 8.95     | 18.0833  | 37.9633  | 31.38    | 23.1833  | E2.7.1.4, scrK   |
| LOC115717051 | beta-amylase 1, chloroplastic                                                  | 2130   | 29.6833  | 27.7933  | 39.67    | 35.2833  | 36.5667  | E3.2.1.2         |
| LOC115717098 | probable trehalose-phosphate phosphatase F                                     | 1731   | 95.5833  | 3.5233   | 112.41   | 49.1633  | 67.59    | otsB             |
| LOC115718719 | UTP--glucose-1-phosphate uridylyltransferase                                   | 1904   | 126.28   | 130.4    | 647.3533 | 200.81   | 434.8367 | UGP2, galU, galF |
| LOC115718920 | alpha-glucan phosphorylase, H isozyme, transcript variant X1                   | 3136   | 30.7533  | 11.79    | 79.77    | 14.0167  | 17.2633  | PYG, glgP        |
| LOC115723010 | beta-amylase 1, chloroplastic                                                  | 2129   | 205.43   | 5.9133   | 256.3167 | 20.77    | 14.4     | E3.2.1.2         |
| LOC115723147 | probable fructokinase-4                                                        | 1344   | 351.17   | 23.4167  | 705.27   | 683.75   | 655.74   | E2.7.1.4, scrK   |

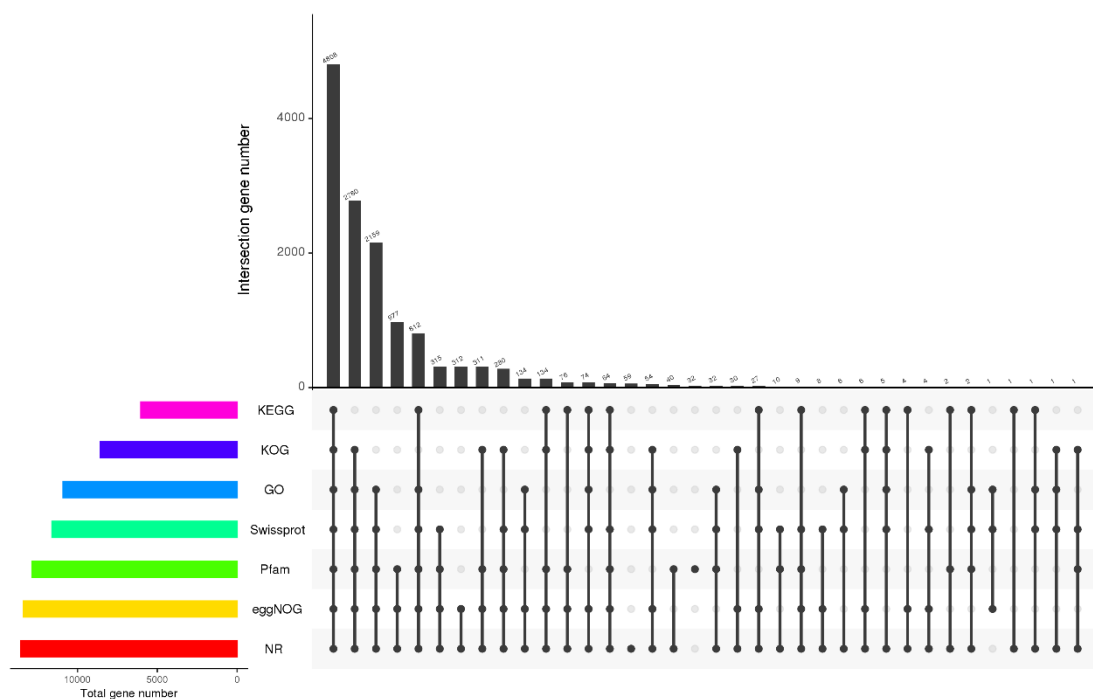

**Figure S1.** Number of intersecting genes in seven public databases

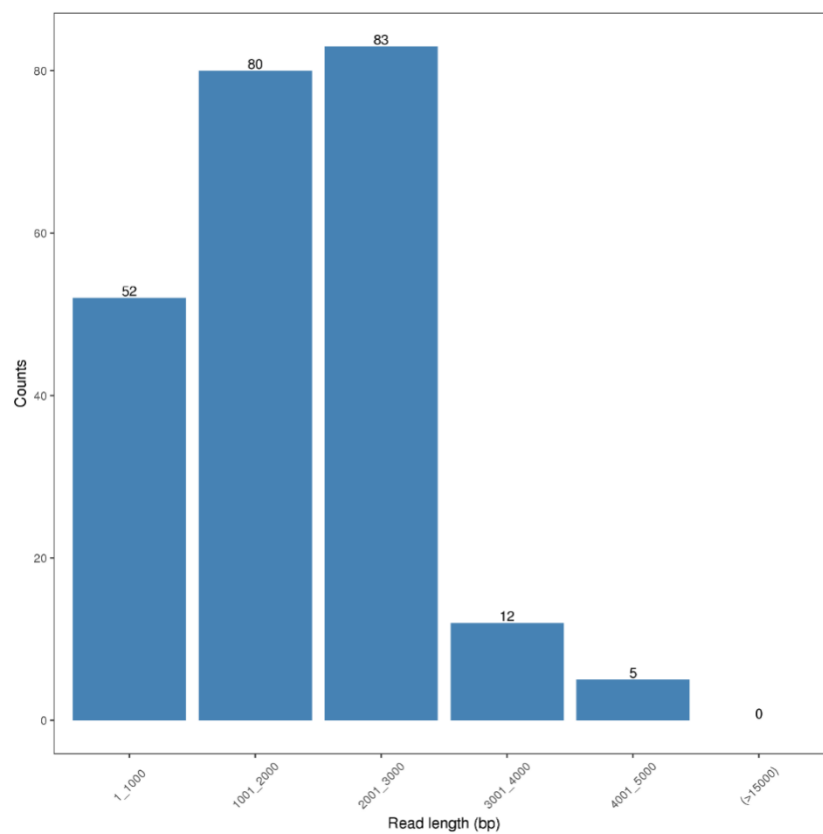

**Figure S2.** The distribution of novel genes
